# Supplementary material for: Dielectric characterization of vegetation at L band using an open-ended coaxial probe
Source: Copernicus journal article supplement (doi:10.5194/gi-7-195-2018), 2018-07-11
Supplement: Supplementary file 2 [file gi-7-195-2018-supplement.zip]

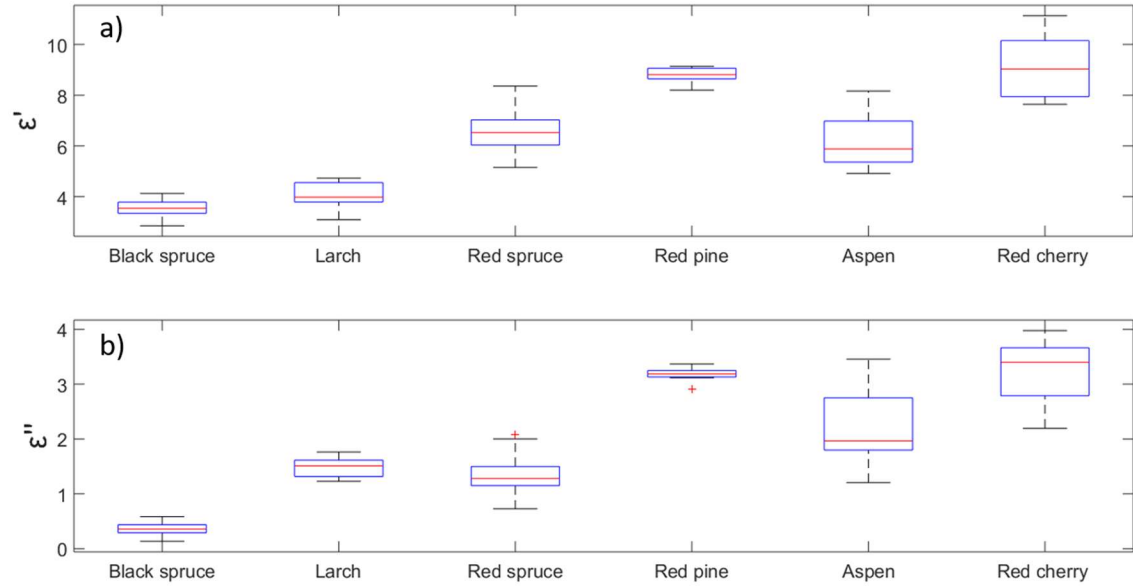

**Figure S7: Variability of the L-band real ( $\epsilon'$ ) and imaginary ( $\epsilon''$ ) relative permittivity (unitless) averaged over the full extend of the trunk radial profile of the frozen trunk of tree species from OBS, SIRENE and Montmorency (MOMO) sites. The data presented in this boxplot are a detailed version of the data in Table 3. The central red mark of the boxplot indicates the median, the blue box includes the data between the 25<sup>th</sup> and 75<sup>th</sup> percentiles, the black whiskers extend the full range of data excluding the outlier data that are represented by a red cross.**
