# Supplementary material for: Dielectric characterization of vegetation at L band using an open-ended coaxial probe
Source: Copernicus journal article supplement (doi:10.5194/gi-7-195-2018), 2018-07-11
Supplement: Supplementary file 3 [file gi-7-195-2018-supplement.zip]

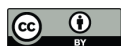

## *Supplement of*

# **Dielectric characterization of vegetation at L band using an open-ended coaxial probe**

**Alex Mavrovic et al.**

*Correspondence to:* Alex Mavrovic ([alex.mavrovic@usherbrooke.ca](mailto:alex.mavrovic@usherbrooke.ca))

- [gi-7-195-2018-supplement-title-page.pdf](#)
- [supplémentaire](#)
  - [fs01.pdf](#)
  - [fs02.pdf](#)
  - [fs03.pdf](#)
  - [fs04.pdf](#)
  - [fs05.pdf](#)
  - [fs06.pdf](#)
  - [fs07 \(1\).pdf](#)
  - [fs07 \(2\).pdf](#)

The copyright of individual parts of the supplement might differ from the CC BY 4.0 License.
